# Supplementary material for: A Novel Antibiotic Mechanism of l-Cyclopropylalanine Blocking the Biosynthetic Pathway of Essential Amino Acid l-Leucine
Source: PubMed Central journal article supplement (PMC6149818; doi:10.3390/molecules22122224), 2017-12-14
Supplement: molecules-22-02224-s001.pdf [file molecules-22-02224-s001.pdf]

Article

# A Novel Antibiotic Mechanism of L-Cyclopropylalanine Blocking the Biosynthetic Pathway of Essential Amino Acid L-Leucine

Bingji Ma <sup>1,\*</sup>, Jinwen Shen <sup>2</sup>, Wandee Yindeeyoungyeon <sup>3</sup> and Yuan Ruan <sup>1</sup>

<sup>1</sup> Department of Traditional Chinese Medicine, Henan Agricultural University, Zhengzhou 450002, China; ruanyuanmbj@163.com

<sup>2</sup> Department of Microbiology, Henan Agricultural University, Zhengzhou 450002, China; shenjinwen369@163.com

<sup>3</sup> National Center for Genetic Engineering and Biotechnology, NSTDA, Pathum Thani 12120, Thailand; wandee@biotec.or.th

\* Correspondence: mbj123@sina.com; Tel.: +86-371-6350-4463

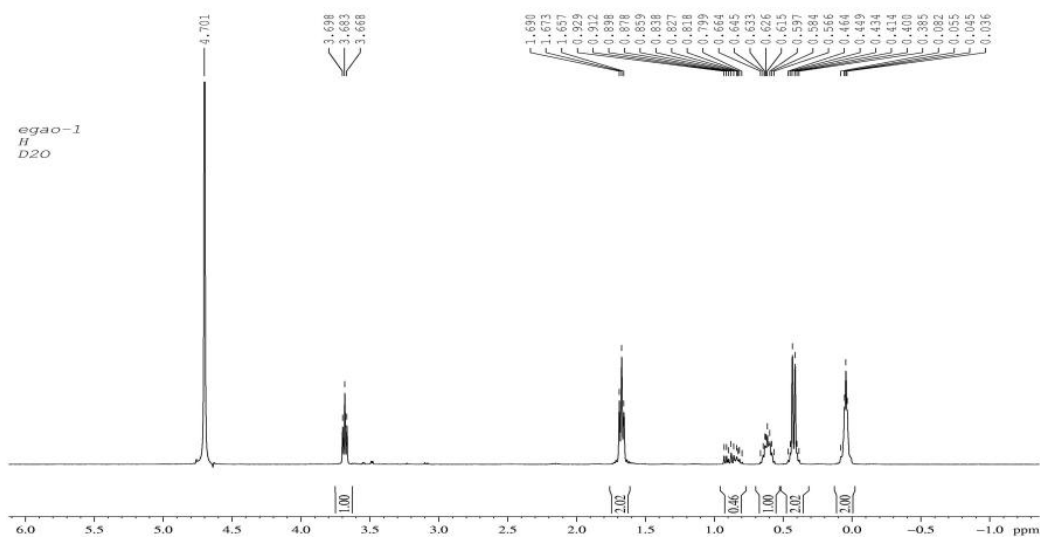

(a)

Figure S1. Cont.

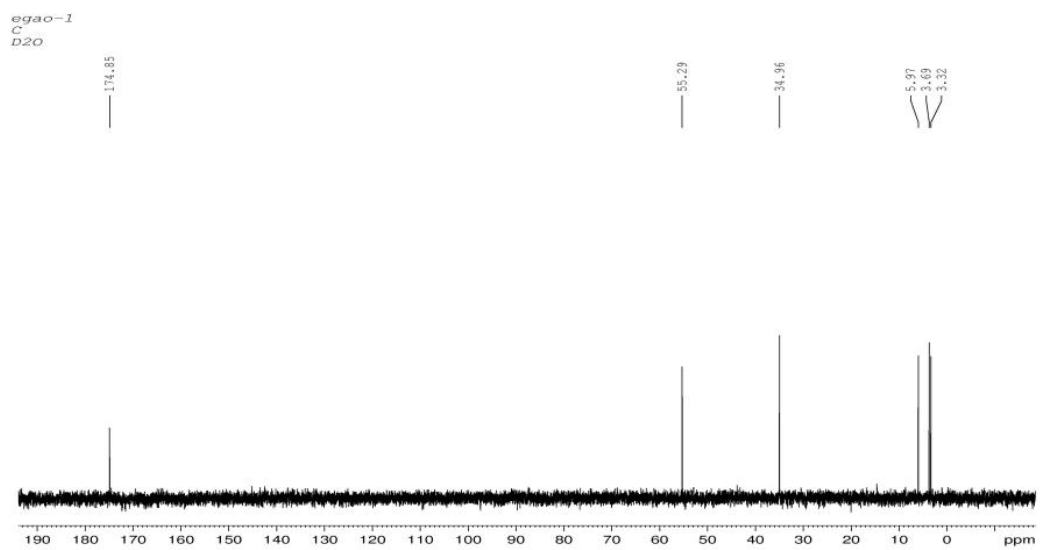

(b)

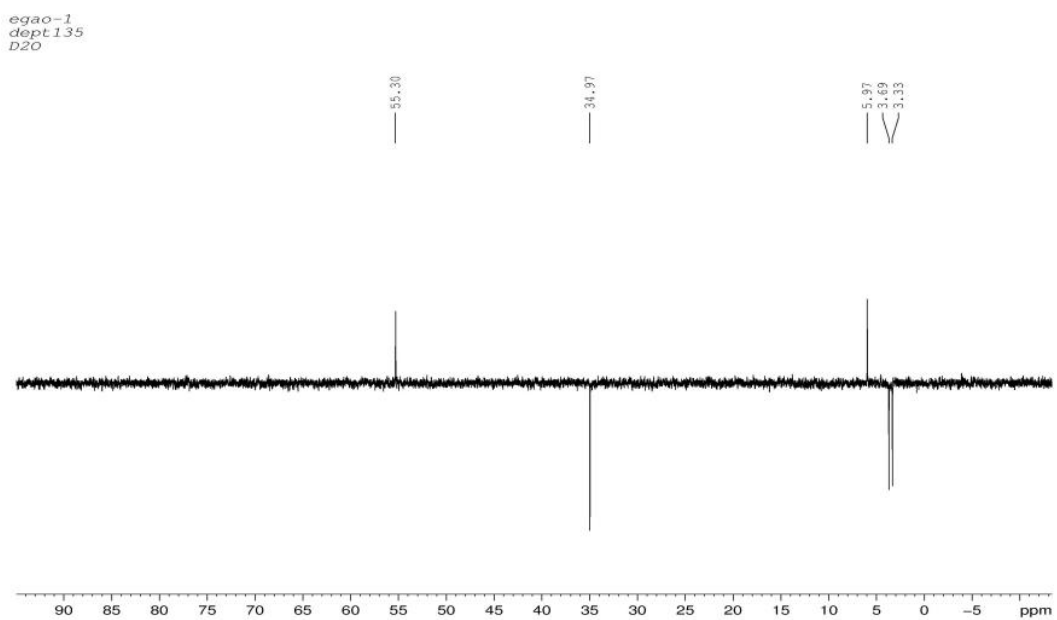

(c)

Figure S1. Cont.

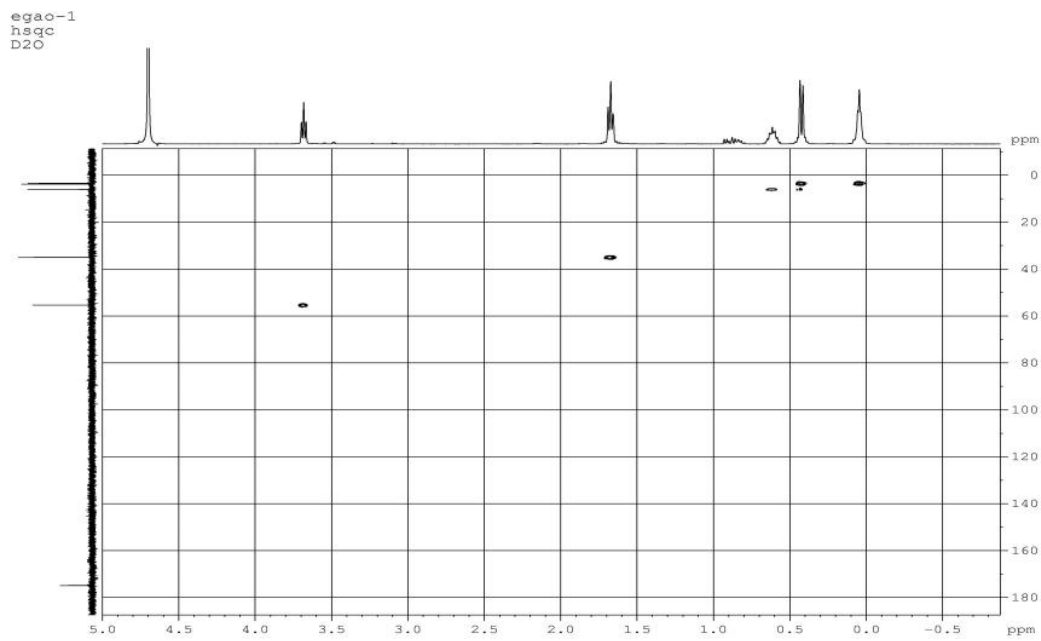

(d)

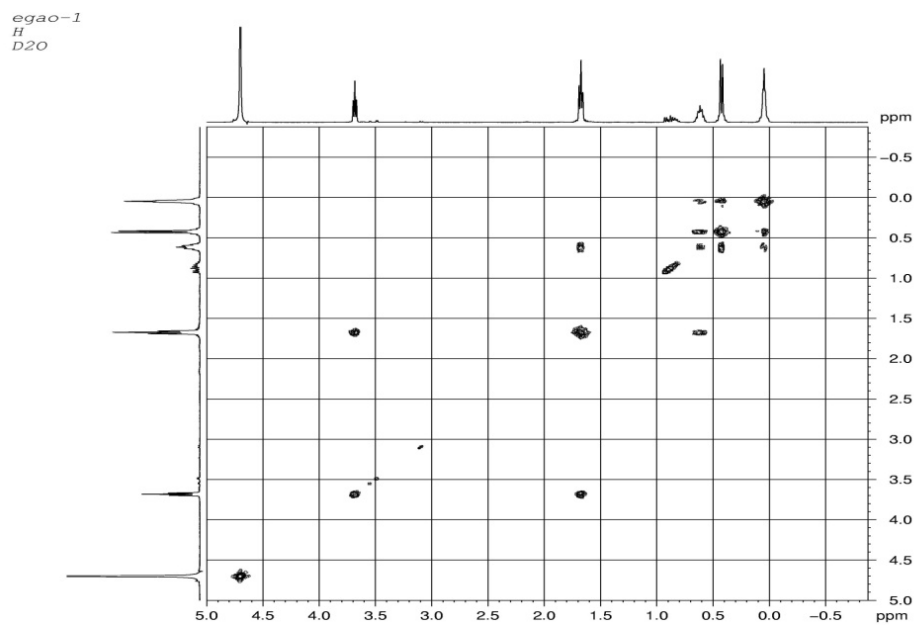

(e)

Figure S1. Cont.

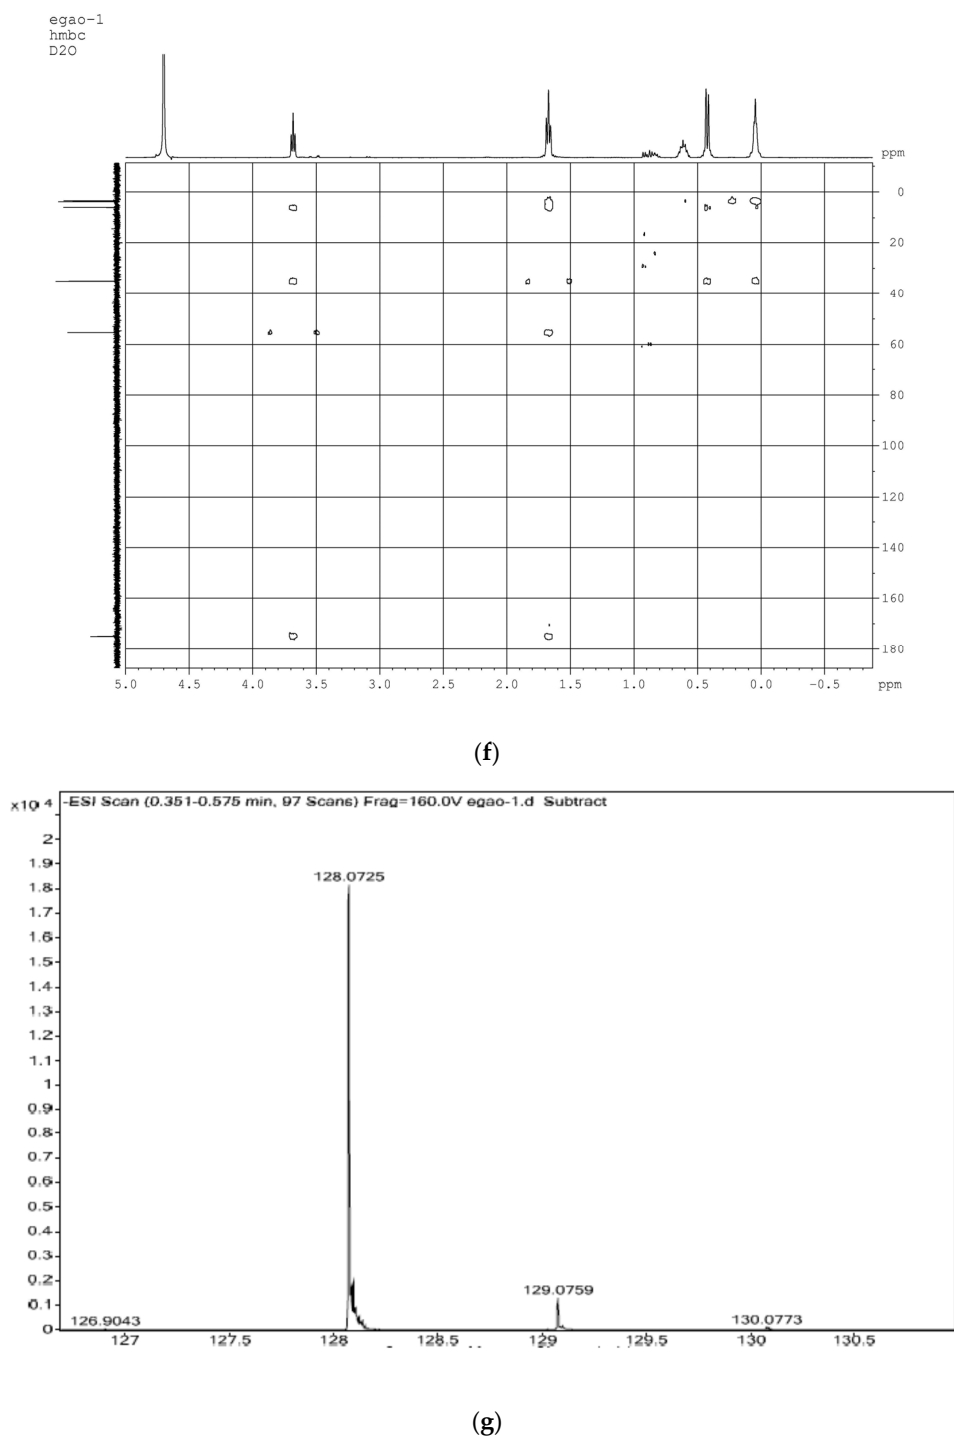

**Figure S1.** NMR and MS spectral of L-cyclopropylalanine (a:  $^1\text{H}$ -NMR; b:  $^{13}\text{C}$ -NMR; c: DEPT 135; d: HSQC; e:  $^1\text{H}$ - $^1\text{H}$  COSY; f: HMBC; g: MS)

**Table S1.** Inhibitory effects of L-cyclopropylalanine and its derivatives **1**, **2** and **3** on *F. graminearum* Schw

| <b>Compounds</b>     | <b>IR at 50 µg/mL</b> | <b>IR at 5 µg/mL</b> |
|----------------------|-----------------------|----------------------|
| L-cyclopropylalanine | 77.2                  | 65.5                 |
| <b>1</b>             | 62.8                  | 45.5                 |
| <b>2</b>             | 9.2                   | 8.8                  |
| <b>3</b>             | 5.9                   | 5.0                  |
